# Supplementary material
Source: PubMed Central journal article supplement (PMC2724113)
Supplement: 00230.2009_1.pdf [file 00230.2009_1.pdf]

**Supplemental Table 1. Baseline Pre-Randomization Volunteer Characteristics**

| <u>General</u>           | <u>PRE</u><br>(N = 20) | <u>POST</u><br>(N = 22) | <u>P Value</u> |
|--------------------------|------------------------|-------------------------|----------------|
| Age (yr)                 | 24 ± 0.65              | 63 ± 1.3                | P < 0.001      |
| BMI (kg/m <sup>2</sup> ) | 24 ± 0.67              | 25 ± 0.81               | P = 0.26       |
| AVF (cm <sup>2</sup> )   | 30 ± 4.1               | 76 ± 9.6                | P < 0.01       |
| <u>Hormones</u>          |                        |                         |                |
| LH (IU/L)                | 5.2 ± 0.74             | 38 ± 2.5                | P < 0.001      |
| FSH (IU/L)               | 4.3 ± 0.54             | 80 ± 5.6                | P < 0.001      |
| E <sub>2</sub> (pg/mL)*  | 92 ± 16                | < 35                    | P < 0.001      |
| SHBG (nmol/L)            | 82 ± 11                | 58 ± 8                  | P = 0.064      |
| T (ng/dL)**              | 30 ± 3.1               | 20 ± 2.8                | P = 0.004      |
| Prolactin (µg/L)         | 11 ± 1.3               | 7 ± 0.34                | P = 0.008      |
| Albumin (g/L)            | 4.6 ± 0.05             | 4.3 ± 0.036             | P < 0.001      |
| IGF-I (µg/L)             | 446 ± 27               | 210 ± 18                | P < 0.001      |
| IGFBP-1 (µg/L)           | 13 ± 2.3               | 24 ± 3.6                | P = 0.030      |
| IGFBP-3 (mg/dL)          | 5.5 ± 0.16             | 4.6 ± 0.20              | P = 0.002      |

---

\* Multiply by 3.68 for pmol/L.

\*\*Multiply by 0.0347 for nmol/L.

**Supplemental Table 2. Summary of three-way ANCOVA estimates of the individual and joint effects of age, E<sub>2</sub> status and peptidyl secretagogue on pulsatile GH secretion**

| P values                 |         | A. <i>Post hoc</i> Tukey's HSD for Age and E <sub>2</sub> Comparisons     |                       |                       |                      |                      |
|--------------------------|---------|---------------------------------------------------------------------------|-----------------------|-----------------------|----------------------|----------------------|
| Overall                  | < 0.001 |                                                                           | POST + E <sub>2</sub> | POST - E <sub>2</sub> | PRE + E <sub>2</sub> | PRE - E <sub>2</sub> |
| Age                      | < 0.001 | POST + E <sub>2</sub>                                                     | 1.0                   |                       |                      |                      |
| E <sub>2</sub> status    | 0.006   | POST - E <sub>2</sub>                                                     | NS                    | 1.0                   |                      |                      |
| Peptide                  | < 0.001 | PRE + E <sub>2</sub>                                                      | < 0.001               | < 0.001               | 1.0                  |                      |
| Age x E <sub>2</sub>     | 0.674   | PRE - E <sub>2</sub>                                                      | 0.097                 | < 0.001               | 0.094                | 1.0                  |
| Age x Peptide            | 0.014   | B. <i>Post hoc</i> Tukey's HSD for Age and Peptide Comparisons            |                       |                       |                      |                      |
| E <sub>2</sub> x Peptide | 0.117   |                                                                           | POST/GHRH             | POST/GHRP-2           | PRE/GHRH             | PRE/GHRP-2           |
| All 3 factors            | 0.181   | POST/GHRH                                                                 | 1.0                   |                       |                      |                      |
| *Covariate               | 0.002   | POST/GHRP-2                                                               | NS                    | 1.0                   |                      |                      |
|                          |         | PRE/GHRH                                                                  | 0.028                 | NS                    | 1.0                  |                      |
|                          |         | PRE/GHRP-2                                                                | < 0.001               | < 0.001               | < 0.001              | 1.0                  |
|                          |         | C. <i>Post hoc</i> Tukey's HSD for E <sub>2</sub> and Peptide Comparisons |                       |                       |                      |                      |

|                         | GHRH + E <sub>2</sub> | GHRP-2 + E <sub>2</sub> | GHRH - E <sub>2</sub> | GHRP-2 - E <sub>2</sub> |
|-------------------------|-----------------------|-------------------------|-----------------------|-------------------------|
| GHRH + E <sub>2</sub>   | 1.0                   |                         |                       |                         |
| GHRP-2 + E <sub>2</sub> | < 0.001               | 1.0                     |                       |                         |
| GHRH - E <sub>2</sub>   | NS                    | < 0.001                 | 1.0                   |                         |
| GHRP-2 - E <sub>2</sub> | NS                    | 0.011                   | 0.027                 | 1.0                     |

---

\*covariate = mean of intrasubject GH concentrations prior to secretagogue infusion

NS denotes  $P > 0.05$

HSD denotes (multiple-comparison) honestly significantly different.

**Supplemental Table 3. Regression analysis****A. Pulsatile GH secretion as dependent variable**

| <u>Regression Model</u> | <u>Independent Variables(s)</u> | <u>Stimulus</u> | <u>R<sup>2</sup> value</u> | <u>P value</u> |         |
|-------------------------|---------------------------------|-----------------|----------------------------|----------------|---------|
| <u>Univariate</u>       | AVF                             | GHRH            | 0.22                       | 0.002          |         |
|                         |                                 | GHRP-2          | 0.28                       | < 0.001        |         |
|                         | BMI                             | GHRH            | 0.17                       | 0.006          |         |
|                         |                                 | GHRP-2          | 0.10                       | 0.038          |         |
| <u>Multivariate*</u>    | AVF                             | GHRH            | 0.22                       | 0.002          |         |
|                         | AGE + E <sub>2</sub>            | GHRP-2          | 0.60                       | < 0.001        |         |
|                         |                                 |                 | Age                        |                | < 0.001 |
|                         |                                 |                 | E <sub>2</sub>             |                | < 0.001 |

**B. Basal GH secretion as dependent variable**

|                      |                      |             |                |       |
|----------------------|----------------------|-------------|----------------|-------|
| <u>Multivariate*</u> | Age + E <sub>2</sub> | No stimulus | 0.22           | 0.009 |
|                      |                      |             | Age            | 0.037 |
|                      |                      |             | E <sub>2</sub> | 0.039 |

---

\*allowable covariates were age, AVF and E<sub>2</sub> concentrations
